# Supplementary material
Source: HighWire-hosted journal article supplement (http://www.qdcxjkg.com/highwire/filestream/114453/field_highwire_adjunct_files/4/ERJ-00388-2014_supplementary_table_S2.pdf)
Supplement: ERJ-00388-2014_supplementary_table_S2.pdf [file ERJ-00388-2014_supplementary_table_S2.pdf]

**Supplementary table 2.** Comparison of number of EXACT-identified events and HCRU events (ITT population)

| <b>EXACT events (n=374)</b>  | <b>All HCRU events</b> | <b>HCRU event severity<sup>a</sup></b> |                 |               |
|------------------------------|------------------------|----------------------------------------|-----------------|---------------|
|                              |                        | <b>Mild</b>                            | <b>Moderate</b> | <b>Severe</b> |
|                              | <b>n=155</b>           | <b>n=30</b>                            | <b>n=109</b>    | <b>n=16</b>   |
| <b>EXACT event, n (%)</b>    | 54 (34.8)              | 10 (33.3)                              | 39 (35.8)       | 5 (31.3)      |
| <b>No EXACT event, n (%)</b> | 101 (65.2)             | 20 (66.7)                              | 70 (64.2)       | 11 (68.7)     |

<sup>a</sup>Mild = self-managed by increasing usual COPD medication (short-acting bronchodilator and/or inhaled corticosteroids); moderate = treated with antibiotics and/or systemic corticosteroids or an increase in systemic corticosteroids; severe = requiring hospitalisation.

EXACT, EXAcerbations of Chronic obstructive pulmonary disease Tool; HCRU, healthcare resource utilisation; ITT, intent-to-treat.
